# Supplementary material for: Highly recyclable and stable CdS-alginate hydrogel beads towards prevention of oxidative release of nanoparticles in complete photocatalytic disinfection of multidrug-resistant Escherichia coli
Source: Royal Society of Chemistry journal article supplement (doi:10.1039/d3ew00473b), 2023-01-01
Supplement: d3ew00473b1.pdf [file d3ew00473b1.pdf]

1 **Supplementary Material**

2

3 **Highly recyclable and stable CdS-alginate hydrogel beads towards prevention of oxidative**  
4 **release of nanoparticles in complete photocatalytic disinfection of multidrug-resistant**  
5 ***Escherichia coli***

6

7 Arkadeep Mukherjee, Sankar Das, Young-Ho Ahn\*

8 Department of Civil Engineering, Yeungnam University, Gyeongsan, 38541, Republic of Korea

9

10 \* Corresponding author: Young-Ho Ahn; e-mail: [yhahn@ynu.ac.kr](mailto:yhahn@ynu.ac.kr); Phone: +82-53-810-3511;

11 Fax +82-53-810-4622

12

13

14

15

16

17

18

19

20

21

22

23

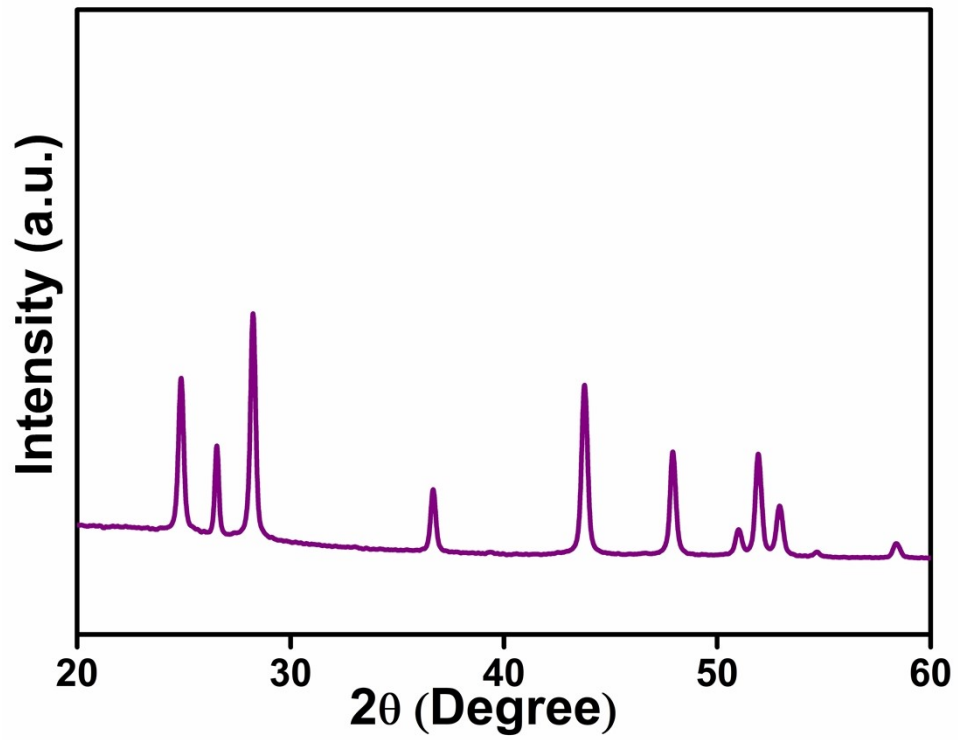

25

26

**Fig. 1S.** X-ray diffraction peaks of the prepared CdS nanorods

27

28

29

30

31

32

33

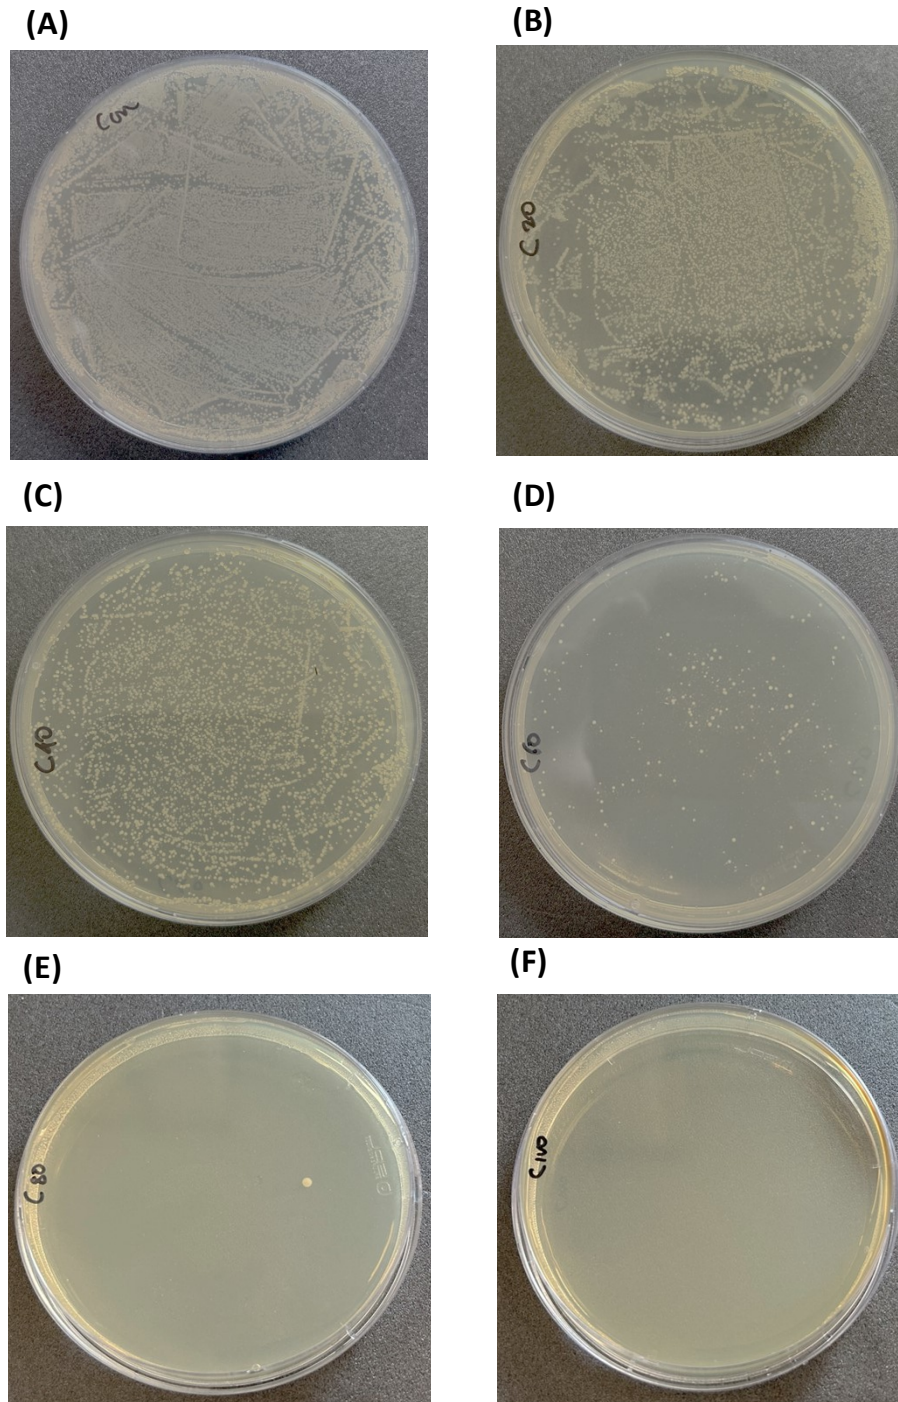

**Fig. 2S.** Bacterial disinfection efficiency using photocatalysis by CdS-ABs (20 %)

34

35

36

37

38

39

40

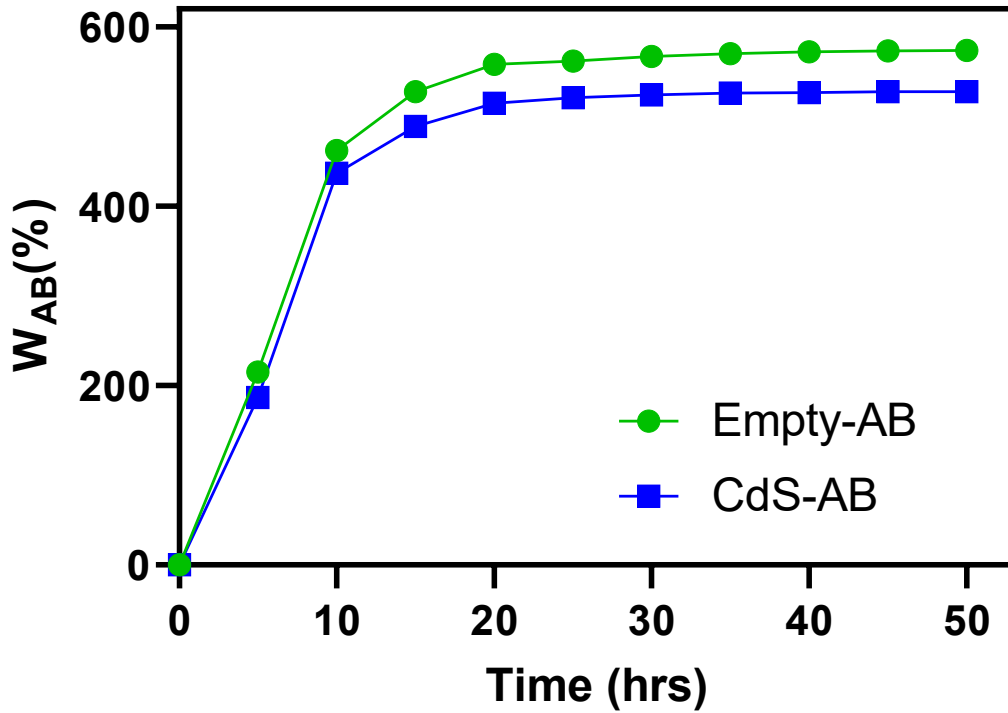

41

42

**Fig. 3S.** The hydrogel bead's swelling behavior with the increase in time

43

44

45

46

47

48

49

50

51

52

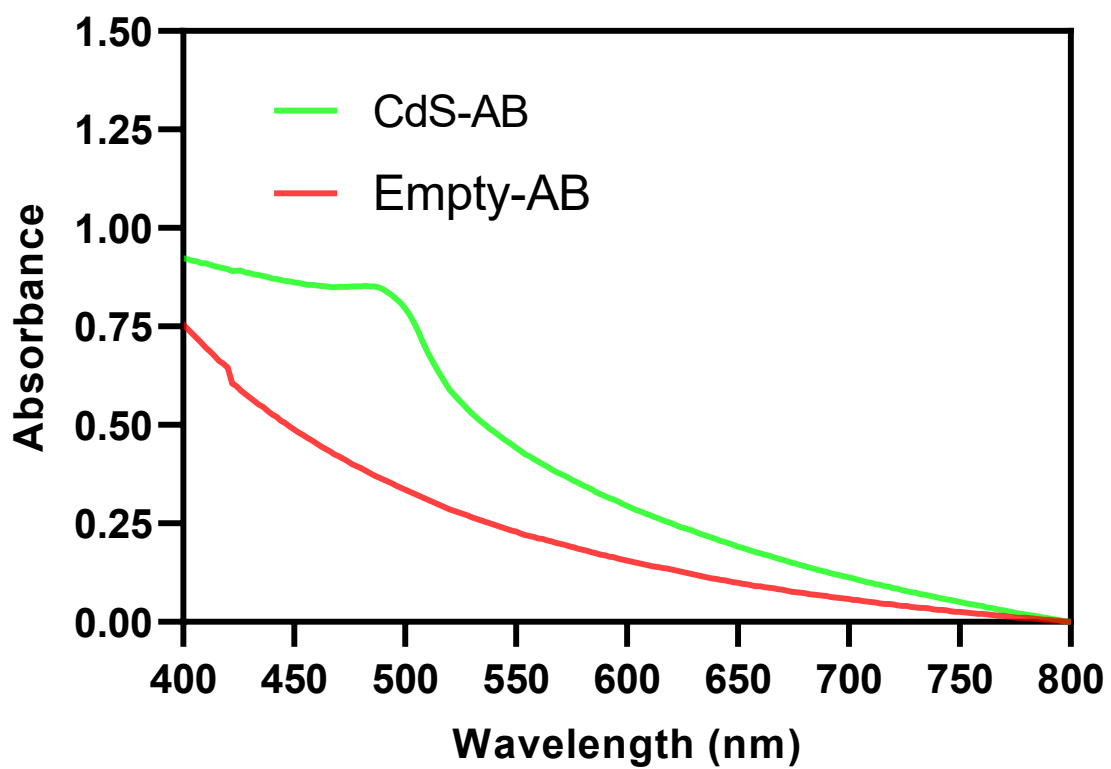

53

54

55

56

57

**Fig. 4S.** Absorbance peak is observed for the CdS-AB at ~480 nm.

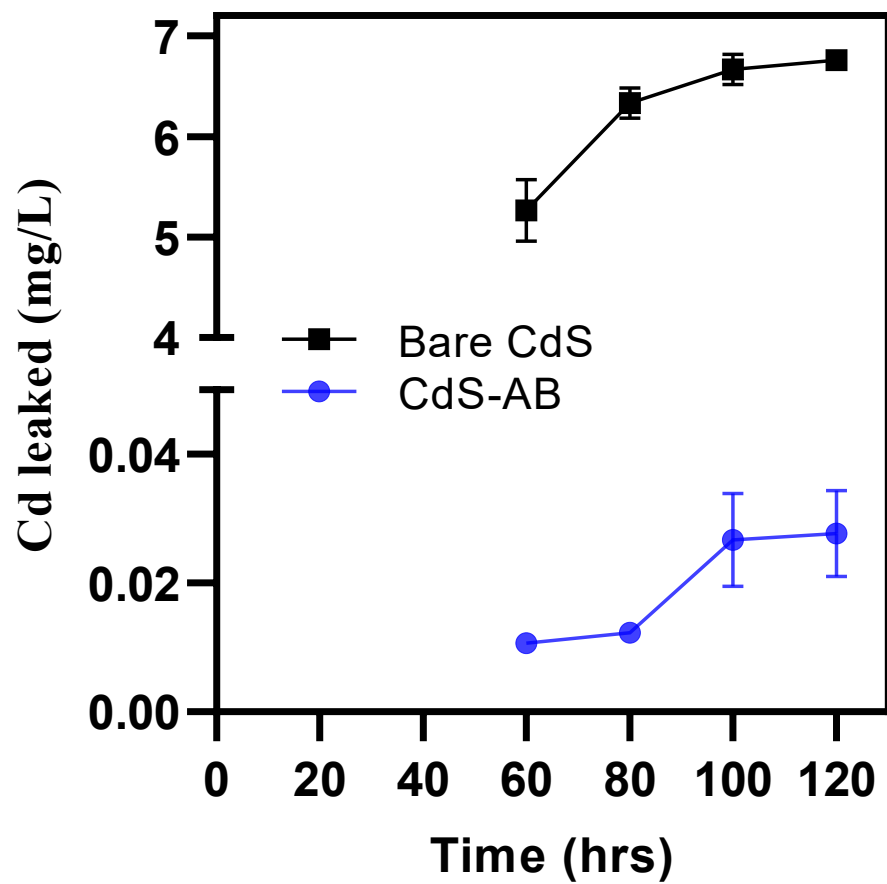

58  
59  
60

**Fig. 5S.** Cd ions leaked from Bare CdS NPs and encapsulated CdS-AB with respect to disinfection treatment time
